# Supplementary material
Source: PubMed Central journal article supplement (PMC5928452)
Supplement: kwx322kehmwebmaterialfinal.pdf [file kwx322kehmwebmaterialfinal.pdf]

*Kehm RD, Spector LG, Poynter JN, Vock DM, Osypuk TL. Socioeconomic status and childhood cancer incidence: a population-based multilevel analysis. Am J Epidemiol.*

**Web Materials:**

Web Figure 1. Bivariate Associations Between Categorical SES and Combined Childhood Cancer Incidence; Registry-Based Case-Cohort Study, Linked Minnesota Birth and Cancer Records, 1989-2014 (Total Sample=14,854; Controls=11,907)

Web Table 1. Characteristics of Cases by Cancer Type; Registry-Based Case-Cohort Study, Minnesota Cancer Surveillance System Linked to Minnesota Birth Registry, 1989-2014 (Total Sample=14,854)

Web Table 2. Correlation Matrix; Registry-Based Case-Cohort Study, Linked Minnesota Birth and Cancer Records, 1989-2014 (Total Sample=14,854)

Web Table 3. Associations Between Neighborhood SES and Childhood Cancer Incidence Estimated From Bivariate and Trivariate Models; Registry-Based Case-Cohort Study, Linked Minnesota Birth and Cancer Records, 1989-2014 (Total Sample=14,854; Controls=11,907)

Web Table 4. Associations Between Established Risk Factors and Childhood Cancer Incidence, Unadjusted and Adjusted for SES, by Cancer Type; Registry-Based Case-Cohort Study, Linked Minnesota Birth and Cancer Records, 1989-2014 (Total Sample=14,854; Controls=11,907)

Web Table 5. Associations Between Paternal Involvement and Combined Childhood Cancer Incidence; Registry-Based Case-Cohort Study, Minnesota Cancer Surveillance System Linked to Minnesota Birth Registry, 1989-2014 (Total Sample=14,854; Controls=11,907)

Web Table 6. Associations Between SES and Combined Childhood Cancer Incidence Stratified by Rural/Urban Status; Registry-Based Case-Cohort Study, Minnesota Cancer Surveillance System Linked to Minnesota Birth Registry, 1989-2014 (Total Sample=14,854; Controls=11,907)

Web Table 7. Correlation Matrix of the Five Census Tract Measures Included in the Neighborhood SES Composite Index; Registry-Based Case-Cohort Study, Minnesota Cancer Surveillance System Linked to Minnesota Birth Registry, 1989-2014 (N=14,854)

Web Table 8. Associations Between Dimensions of Neighborhood SES and Combined Childhood Cancer Incidence; Registry-Based Case-Cohort Study, Minnesota Cancer

Surveillance System Linked to Minnesota Birth Registry, 1989-2014 (Total Sample=14,854; Controls=11,907)

Web Table 9. Testing Validity of Linearly Interpolated Census Tract SES Composite Index: Associations Between Neighborhood SES and Combined Childhood Cancer Incidence; Registry-Based Case-Cohort Study, Minnesota Cancer Surveillance System Linked to Minnesota Birth Registry, 1989-2014 (Total Sample=14,854; Controls=11,907)

Web Table 10. Associations Between SES and Incidence of Childhood Lymphomas Stratified by Cancer Subtype; Registry-Based Case-Cohort Study, Minnesota Cancer Surveillance System Linked to Minnesota Birth Registry, 1989-2014 (Total Sample=14,854; Controls=11,907)

Web Table 11. Associations Between Maternal Education and Incidence of Childhood Central Nervous System Tumors Stratified by Cancer Subtype; Registry-Based Case-Cohort Study, Minnesota Cancer Surveillance System Linked to Minnesota Birth Registry, 1989-2014 (Total Sample=14,854; Controls=11,907)

Web Table 12. Associations Between SES and Combined Childhood Cancer Incidence Stratified by Age Group at Diagnosis; Registry-Based Case-Cohort Study, Minnesota Cancer Surveillance System Linked to Minnesota Birth Registry, 1989-2014 (Total Sample=14,854; Controls=11,907)

Web Table 13. Associations Between SES and Combined Childhood Cancer Incidence Stratified by Race and Ethnicity; Registry-Based Case-Cohort Study, Minnesota Cancer Surveillance System Linked to Minnesota Birth Registry, 1989-2014 (Total Sample=14,854; Controls=11,907)

Web Figure 1. Bivariate Associations Between Categorical SES and Combined Childhood Cancer Incidence; Registry-Based Case-Cohort Study, Linked Minnesota Birth and Cancer Records, 1989-2014 (Total Sample=14,854; Controls=11,907)

A. Individual-level SES (entire sample:  $n = 14,854$ )

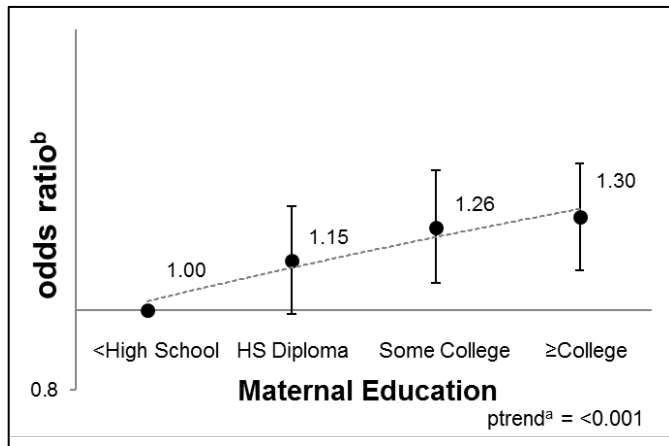

B. Neighborhood-level SES (entire sample:  $n = 14,854$ )

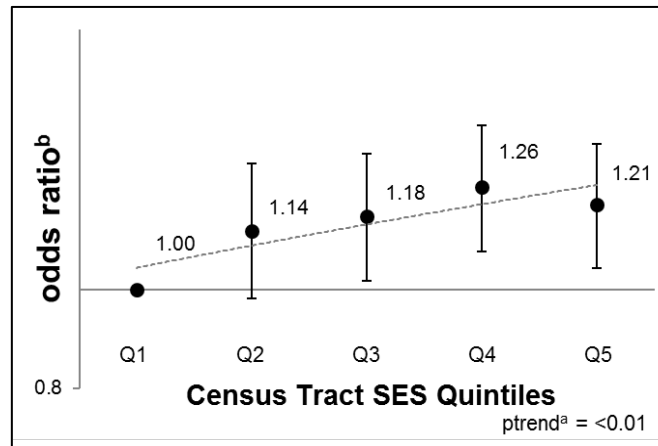

C. Individual-level SES (NH-whites only:  $n = 12,127$ )<sup>c</sup>

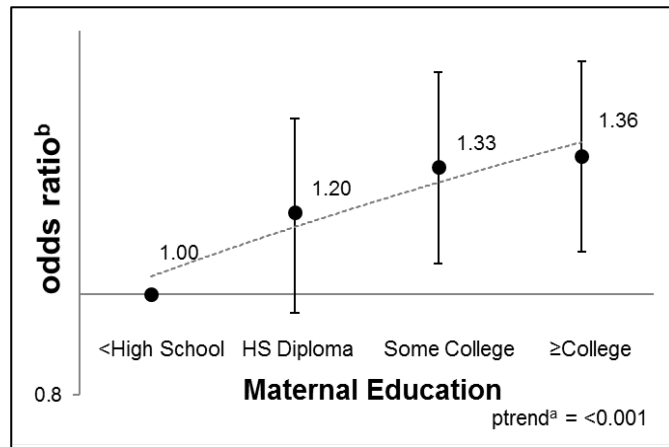

D. Neighborhood-level SES (NH-whites only:  $n = 12,127$ )<sup>cd</sup>

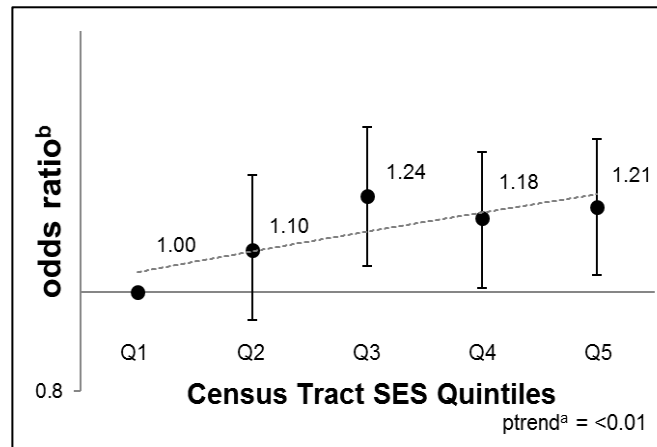

Abbreviations: HS, high school; NH, non-Hispanic; SES, socioeconomic status

<sup>a</sup>P-trend tests linear combination across categories; estimated from a logistic mixed model with a random intercept for census tract clustering using a two-sided hypothesis test.

<sup>b</sup>Odds ratios and 95% confidence intervals plotted on the log scale; reference = lowest SES category (<high school/Q1 neighborhood).

<sup>c</sup>Non-Hispanic White Sample: Cases = 2,496; controls = 9,631

<sup>d</sup>Census tract SES index values recategorized into quintiles among the restricted non-Hispanic white sample.

Web Table 1. Characteristics of Cases by Cancer Type; Registry-Based Case-Cohort Study, Minnesota Cancer Surveillance System Linked to Minnesota Birth Registry, 1989-2014 (Total Sample=14,854)

| Variable                          | ALL<br>(n = 673) | AML<br>(n = 112) | Lymph<br>(n = 311) | CNS<br>(n = 662) | Neuro<br>(n = 267) | Retino<br>(n = 80) | Wilms'<br>(n = 198) | Hepato<br>(n = 50) | Rhabdo<br>(n = 79) |
|-----------------------------------|------------------|------------------|--------------------|------------------|--------------------|--------------------|---------------------|--------------------|--------------------|
| <i>Birth Characteristics</i>      |                  |                  |                    |                  |                    |                    |                     |                    |                    |
| Birth year, mean (SD)             | 1999 (6.2)       | 2000 (6.4)       | 1999 (6.5)         | 1999 (6.5)       | 2001 (7.3)         | 2002 (7.2)         | 2000 (6.7)          | 2001 (6.9)         | 1998 (5.9)         |
| Female sex, %                     | 45.8             | 50.0             | 34.4               | 45.9             | 40.8               | 53.8               | 44.4                | 28.0               | 41.8               |
| Birth weight, mean (SD), grams    | 3,475 (588)      | 3,541 (583)      | 3,438 (574)        | 3,461 (560)      | 3,400 (328)        | 3,423 (549)        | 3,508 (640)         | 2,803 (1,118)      | 3,457 (552)        |
| Gestation, mean (SD), weeks       | 38.9 (1.9)       | 39.1 (1.6)       | 39.0 (1.8)         | 39.0 (2.0)       | 38.7 (2.2)         | 39.0 (1.9)         | 38.8 (2.2)          | 36.1 (5.4)         | 38.7 (1.8)         |
| First born, %                     | 38.6             | 34.8             | 35.7               | 42.0             | 42.0               | 41.3               | 40.6                | 42.0               | 43.0               |
| <i>Mother's Characteristics</i>   |                  |                  |                    |                  |                    |                    |                     |                    |                    |
| Age at delivery, mean (SD), years | 28.5 (5.8)       | 29.1 (5.6)       | 28.6 (5.2)         | 28.3 (5.5)       | 28.4 (5.9)         | 27.6 (5.7)         | 28.6 (5.7)          | 28.0 (5.9)         | 28.7 (6.2)         |
| Non-Hispanic White, %             | 84.3             | 78.4             | 83.2               | 89.4             | 85.0               | 76.3               | 90.4                | 74.0               | 88.6               |
| Education, %                      |                  |                  |                    |                  |                    |                    |                     |                    |                    |
| < high school diploma             | 8.9              | 9.3              | 6.9                | 9.1              | 8.7                | 10.4               | 7.1                 | 22.5               | 10.3               |
| high school diploma               | 28.0             | 9.3              | 28.2               | 25.8             | 26.4               | 19.5               | 26.5                | 32.7               | 33.3               |
| some college                      | 26.3             | 20.4             | 30.5               | 28.9             | 26.4               | 33.8               | 30.6                | 20.4               | 32.1               |
| ≥ bachelor's degree               | 36.9             | 37.0             | 34.4               | 36.2             | 38.5               | 36.4               | 35.7                | 24.5               | 24.4               |
| Neighborhood SES, mean (SD)       | 0.07 (6.4)       | 0.05 (1.0)       | 0.11 (0.9)         | 0.13 (0.8)       | 0.00 (0.9)         | 0.05 (1.1)         | 0.09 (0.8)          | -0.3 (1.2)         | 0.11 (0.8)         |

Abbreviations: ALL, acute lymphoblastic leukemia; AML, acute myeloid leukemia; CNS, central nervous system tumors; Hepato, hepatoblastoma; Lymph, lymphomas; Neuro, neuroblastoma; Retino, retinoblastoma; Rhabdo, rhabdomyosarcoma; SD, standard deviation; SES, socioeconomic status; Wilms', Wilms' tumor

Web Table 2. Correlation Matrix; Registry-Based Case-Cohort Study, Linked Minnesota Birth and Cancer Records, 1989-2014 (Total Sample=14,854)

| Variable                         | Correlation <sup>a</sup> |       |      |       |       |       |      |      |   |
|----------------------------------|--------------------------|-------|------|-------|-------|-------|------|------|---|
|                                  | 1                        | 2     | 3    | 4     | 5     | 6     | 7    | 8    | 9 |
| 1. Birth Year                    | 1                        |       |      |       |       |       |      |      |   |
| 2. Female                        | -0.02                    | 1     |      |       |       |       |      |      |   |
| 3. Mother NH White               | -0.16                    | 0.01  | 1    |       |       |       |      |      |   |
| 4. Maternal Age                  | 0.05                     | 0.01  | 0.18 | 1     |       |       |      |      |   |
| 5. Birthweight                   | -0.04                    | -0.09 | 0.11 | 0.08  | 1     |       |      |      |   |
| 6. Gestational Age               | -0.08                    | 0.03  | 0.02 | -0.03 | 0.63  | 1     |      |      |   |
| 7. First Born                    | 0.01                     | 0.02  | 0.03 | -0.32 | -0.09 | 0.02  | 1    |      |   |
| 8. Maternal Education            | 0.10                     | 0.00  | 0.28 | 0.45  | 0.10  | -0.02 | 0.02 | 1    |   |
| 9. Neighborhood SES <sup>b</sup> | -0.01                    | 0.00  | 0.41 | 0.26  | 0.09  | 0.00  | 0.00 | 0.35 | 1 |

Abbreviations: NH, non-Hispanic; SES, socioeconomic status

<sup>a</sup>Pearson correlation estimated continuous/continuous associations; Spearman correlation estimated ordinal/continuous and ordinal/dichotomous associations; tetrachoric correlation estimated dichotomous/dichotomous associations; and biserial correlation estimated dichotomous/continuous associations.

<sup>b</sup>Higher values indicate higher neighborhood SES

Web Table 3. Associations Between Neighborhood SES and Childhood Cancer Incidence Estimated From Bivariate and Trivariate Models; Registry-Based Case-Cohort Study, Linked Minnesota Birth and Cancer Records, 1989-2014 (Total Sample=14,854; Controls=11,907)

| Model                           | All Cancers Combined<br>(n = 2,947) |            |                |                | Acute Lymphoblastic Leukemia<br>(n = 673)  |            |                |                |
|---------------------------------|-------------------------------------|------------|----------------|----------------|--------------------------------------------|------------|----------------|----------------|
|                                 | OR                                  | 95% CI     | P <sup>a</sup> | % <sup>b</sup> | OR                                         | 95% CI     | P <sup>a</sup> | % <sup>b</sup> |
| Bivariate <sup>c</sup>          | 1.09                                | 1.04, 1.14 | <0.001         |                | 1.10                                       | 1.01, 1.20 | 0.03           |                |
| Trivariate <i>adjusted for:</i> |                                     |            |                |                |                                            |            |                |                |
| Race/Ethnicity <sup>d</sup>     | 1.05                                | 1.00, 1.11 | 0.04           | 39             | 1.08                                       | 0.99, 1.19 | 0.10           | 18             |
| Maternal Age                    | 1.08                                | 1.03, 1.13 | <0.01          | 14             | 1.09                                       | 0.99, 1.18 | 0.07           | 15             |
| Birthweight                     | 1.08                                | 1.04, 1.13 | <0.001         | 5              | 1.09                                       | 1.00, 1.19 | 0.05           | 10             |
| Gestational Age                 | 1.09                                | 1.04, 1.14 | <0.001         | 0              | 1.10                                       | 1.01, 1.20 | 0.03           | 0              |
| First Born                      | 1.09                                | 1.04, 1.14 | <0.001         | 0              | 1.10                                       | 1.01, 1.20 | 0.03           | 0              |
| Sex                             | 1.09                                | 1.04, 1.14 | <0.001         | -1             | 1.10                                       | 1.01, 1.20 | 0.03           | 0              |
| Birth Year                      | 1.09                                | 1.04, 1.14 | <0.001         | 0              | 1.10                                       | 1.01, 1.20 | 0.03           | 0              |
| Model                           | Lymphomas<br>(n = 311)              |            |                |                | Central Nervous System Tumors<br>(n = 662) |            |                |                |
|                                 | OR                                  | 95% CI     | P <sup>a</sup> | % <sup>b</sup> | OR                                         | 95% CI     | P <sup>a</sup> | % <sup>b</sup> |
| Bivariate <sup>c</sup>          | 1.14                                | 1.01, 1.30 | 0.04           |                | 1.18                                       | 1.08, 1.29 | <0.001         |                |
| Trivariate <i>adjusted for:</i> |                                     |            |                |                |                                            |            |                |                |
| Race/Ethnicity <sup>d</sup>     | 1.15                                | 1.00, 1.31 | 0.05           | 0              | 1.09                                       | 0.99, 1.20 | 0.09           | 49             |
| Maternal Age                    | 1.13                                | 0.99, 1.28 | 0.07           | 12             | 1.18                                       | 1.08, 1.30 | <0.01          | 0              |
| Birthweight                     | 1.14                                | 1.00, 1.29 | 0.04           | 3              | 1.17                                       | 1.07, 1.28 | <0.01          | 4              |
| Gestational Age                 | 1.15                                | 1.01, 1.30 | 0.04           | 0              | 1.18                                       | 1.08, 1.29 | <0.001         | 0              |
| First Born                      | 1.15                                | 1.01, 1.30 | 0.04           | 0              | 1.18                                       | 1.08, 1.29 | <0.001         | 0              |
| Sex                             | 1.15                                | 1.01, 1.30 | 0.04           | -1             | 1.18                                       | 1.08, 1.29 | <0.001         | 0              |
| Birth Year                      | 1.15                                | 1.01, 1.30 | 0.04           | -1             | 1.18                                       | 1.08, 1.29 | <0.001         | 0              |

Abbreviations: CI, confidence interval; OR, odds ratio; SES, socioeconomic status

<sup>a</sup>P-values estimated from a logistic mixed model with a random intercept for census tract clustering using a two-sided hypothesis test.

<sup>b</sup>Compares the beta coefficients for maternal education predicting cancer incidence estimated from bivariate and trivariate models (i.e.  $\beta_{\text{bivar}} - \beta_{\text{trivar}} / \beta_{\text{bivar}}$ ).

<sup>c</sup>Equal to Model 1A in Table 2

<sup>d</sup>Equal to Model 2A in Table 2

Web Table 4. Associations Between Established Risk Factors and Childhood Cancer Incidence, Unadjusted and Adjusted for SES, by Cancer Type; Registry-Based Case-Cohort Study, Linked Minnesota Birth and Cancer Records, 1989-2014 (Total Sample=14,854; Controls=11,907)

| Variable                     | Acute Lymphoblastic Leukemia ( <i>n</i> = 673)                                       |            |                |                                                                                          |            |                | Acute Myeloid Leukemia ( <i>n</i> = 112)                                             |            |                |                                                                                          |            |                | Lymphomas ( <i>n</i> = 311)                                                          |            |                |                                                                                          |            |                |
|------------------------------|--------------------------------------------------------------------------------------|------------|----------------|------------------------------------------------------------------------------------------|------------|----------------|--------------------------------------------------------------------------------------|------------|----------------|------------------------------------------------------------------------------------------|------------|----------------|--------------------------------------------------------------------------------------|------------|----------------|------------------------------------------------------------------------------------------|------------|----------------|
|                              | Adjusted for demographic and birth covariates (SES excluded from model) <sup>a</sup> |            |                | Adjusted for demographic, birth, and SES covariates (SES included in model) <sup>b</sup> |            |                | Adjusted for demographic and birth covariates (SES excluded from model) <sup>a</sup> |            |                | Adjusted for demographic, birth, and SES covariates (SES included in model) <sup>b</sup> |            |                | Adjusted for demographic and birth covariates (SES excluded from model) <sup>a</sup> |            |                | Adjusted for demographic, birth, and SES covariates (SES included in model) <sup>b</sup> |            |                |
|                              | OR                                                                                   | 95% CI     | P <sup>c</sup> | OR                                                                                       | 95% CI     | P <sup>c</sup> | OR                                                                                   | 95% CI     | P <sup>c</sup> | OR                                                                                       | 95% CI     | P <sup>c</sup> | OR                                                                                   | 95% CI     | P <sup>c</sup> | OR                                                                                       | 95% CI     | P <sup>c</sup> |
| Race/Ethnicity <sup>d</sup>  | 1.11                                                                                 | 0.89, 1.39 | 0.34           | 1.03                                                                                     | 0.81, 1.32 | 0.79           | 0.73                                                                                 | 0.46, 1.17 | 0.20           | 0.70                                                                                     | 0.42, 1.18 | 0.19           | 1.06                                                                                 | 0.77, 1.45 | 0.73           | 0.89                                                                                     | 0.64, 1.26 | 0.52           |
| Maternal Age <sup>e</sup>    | 1.05                                                                                 | 0.98, 1.13 | 0.17           | 1.02                                                                                     | 0.94, 1.11 | 0.56           | 1.16                                                                                 | 0.98, 1.38 | 0.09           | 1.16                                                                                     | 0.96, 1.41 | 0.12           | 1.08                                                                                 | 0.97, 1.20 | 0.17           | 1.02                                                                                     | 0.90, 1.15 | 0.79           |
| Birthweight <sup>f</sup>     | 1.20                                                                                 | 1.10, 1.30 | <0.001         | 1.19                                                                                     | 1.09, 1.30 | <0.001         | 1.23                                                                                 | 1.00, 1.52 | 0.05           | 1.23                                                                                     | 1.00, 1.52 | 0.05           | 0.97                                                                                 | 0.85, 1.10 | 0.61           | 0.96                                                                                     | 0.84, 1.09 | 0.50           |
| Gestational Age <sup>g</sup> | 0.92                                                                                 | 0.88, 0.97 | <0.001         | 0.92                                                                                     | 0.88, 0.97 | <0.01          | 0.99                                                                                 | 0.87, 1.13 | 0.88           | 0.99                                                                                     | 0.87, 1.13 | 0.90           | 1.04                                                                                 | 0.97, 1.13 | 0.27           | 1.05                                                                                     | 0.97, 1.13 | 0.23           |
| First Born <sup>h</sup>      | 1.08                                                                                 | 0.91, 1.28 | 0.37           | 1.06                                                                                     | 0.89, 1.26 | 0.53           | 1.00                                                                                 | 0.66, 1.51 | 0.99           | 1.00                                                                                     | 0.66, 1.53 | 0.99           | 0.92                                                                                 | 0.72, 1.19 | 0.54           | 0.88                                                                                     | 0.68, 1.14 | 0.33           |
| Variable                     | Central Nervous System Tumors ( <i>n</i> = 662)                                      |            |                |                                                                                          |            |                | Neuroblastoma ( <i>n</i> = 267)                                                      |            |                |                                                                                          |            |                | Retinoblastoma ( <i>n</i> = 80)                                                      |            |                |                                                                                          |            |                |
|                              | OR                                                                                   | 95% CI     | P <sup>c</sup> | OR                                                                                       | 95% CI     | P <sup>c</sup> | OR                                                                                   | 95% CI     | P <sup>c</sup> | OR                                                                                       | 95% CI     | P <sup>c</sup> | OR                                                                                   | 95% CI     | P <sup>c</sup> | OR                                                                                       | 95% CI     | P <sup>c</sup> |
| Race/Ethnicity <sup>d</sup>  | 1.83                                                                                 | 1.41, 2.36 | <0.001         | 1.66                                                                                     | 1.26, 2.19 | <0.001         | 1.38                                                                                 | 0.97, 1.96 | 0.08           | 1.40                                                                                     | 0.95, 2.06 | 0.09           | 0.82                                                                                 | 0.48, 1.42 | 0.49           | 0.66                                                                                     | 0.37, 1.19 | 0.17           |
| Maternal Age <sup>e</sup>    | 1.03                                                                                 | 0.95, 1.10 | 0.49           | 1.00                                                                                     | 0.92, 1.08 | 0.94           | 1.04                                                                                 | 0.93, 1.17 | 0.49           | 1.02                                                                                     | 0.89, 1.16 | 0.77           | 0.93                                                                                 | 0.75, 1.14 | 0.48           | 0.82                                                                                     | 0.64, 1.06 | 0.13           |
| Birthweight <sup>f</sup>     | 1.07                                                                                 | 0.98, 1.17 | 0.12           | 1.07                                                                                     | 0.98, 1.17 | 0.15           | 1.06                                                                                 | 0.92, 1.22 | 0.40           | 1.06                                                                                     | 0.92, 1.21 | 0.43           | 1.06                                                                                 | 0.83, 1.37 | 0.63           | 1.05                                                                                     | 0.81, 1.35 | 0.72           |
| Gestational Age <sup>g</sup> | 1.00                                                                                 | 0.95, 1.05 | 0.94           | 1.00                                                                                     | 0.95, 1.05 | 0.99           | 0.94                                                                                 | 0.87, 1.01 | 0.09           | 0.94                                                                                     | 0.87, 1.01 | 0.09           | 1.01                                                                                 | 0.87, 1.17 | 0.92           | 1.01                                                                                     | 0.87, 1.18 | 0.88           |
| First Born <sup>h</sup>      | 1.18                                                                                 | 0.99, 1.39 | 0.06           | 1.15                                                                                     | 0.97, 1.37 | 0.11           | 1.19                                                                                 | 0.91, 1.55 | 0.20           | 1.17                                                                                     | 0.89, 1.53 | 0.26           | 1.06                                                                                 | 0.66, 1.71 | 0.81           | 0.96                                                                                     | 0.59, 1.57 | 0.87           |
| Variable                     | Wilms' Tumor ( <i>n</i> = 198)                                                       |            |                |                                                                                          |            |                | Hepatoblastoma ( <i>n</i> = 50)                                                      |            |                |                                                                                          |            |                | Rhabdomyosarcoma ( <i>n</i> = 79)                                                    |            |                |                                                                                          |            |                |
|                              | OR                                                                                   | 95% CI     | P <sup>c</sup> | OR                                                                                       | 95% CI     | P <sup>c</sup> | OR                                                                                   | 95% CI     | P <sup>c</sup> | OR                                                                                       | 95% CI     | P <sup>c</sup> | OR                                                                                   | 95% CI     | P <sup>c</sup> | OR                                                                                       | 95% CI     | P <sup>c</sup> |
| Race/Ethnicity <sup>d</sup>  | 2.04                                                                                 | 1.25, 3.31 | <0.01          | 2.05                                                                                     | 1.22, 3.46 | 0.01           | 0.76                                                                                 | 0.39, 1.48 | 0.42           | 1.05                                                                                     | 0.49, 2.24 | 0.91           | 1.41                                                                                 | 0.68, 2.94 | 0.36           | 1.54                                                                                     | 0.70, 3.38 | 0.28           |
| Maternal Age <sup>e</sup>    | 1.03                                                                                 | 0.90, 1.18 | 0.63           | 1.03                                                                                     | 0.89, 1.20 | 0.71           | 1.04                                                                                 | 0.81, 1.35 | 0.73           | 1.21                                                                                     | 0.92, 1.59 | 0.17           | 1.13                                                                                 | 0.91, 1.39 | 0.26           | 1.23                                                                                     | 0.98, 1.54 | 0.08           |
| Birthweight <sup>f</sup>     | 1.31                                                                                 | 1.12, 1.53 | <0.01          | 1.31                                                                                     | 1.12, 1.53 | <0.01          | 0.82                                                                                 | 0.59, 1.13 | 0.23           | 0.84                                                                                     | 0.61, 1.16 | 0.30           | 1.26                                                                                 | 0.98, 1.62 | 0.08           | 1.28                                                                                     | 0.99, 1.65 | 0.06           |
| Gestational Age <sup>g</sup> | 0.88                                                                                 | 0.81, 0.96 | 0.01           | 0.88                                                                                     | 0.81, 0.96 | 0.01           | 0.85                                                                                 | 0.75, 0.97 | 0.02           | 0.85                                                                                     | 0.75, 0.97 | 0.01           | 0.87                                                                                 | 0.76, 0.99 | 0.04           | 0.86                                                                                     | 0.76, 0.99 | 0.04           |
| First Born <sup>h</sup>      | 1.18                                                                                 | 0.87, 1.61 | 0.28           | 1.18                                                                                     | 0.86, 1.61 | 0.30           | 1.12                                                                                 | 0.61, 2.06 | 0.70           | 1.26                                                                                     | 0.68, 2.35 | 0.46           | 1.40                                                                                 | 0.86, 2.29 | 0.17           | 1.52                                                                                     | 0.93, 2.50 | 0.10           |

Abbreviations: CI, confidence interval; NH, non-Hispanic; OR, odds ratio; SES, socioeconomic status

<sup>a</sup>Adjusted for maternal race/ethnicity, maternal age, birth order, birth year, sex, birthweight, and gestational age

<sup>b</sup>Adjusted for maternal race/ethnicity, maternal age, birth order, birth year, sex, birthweight, gestational age, maternal education, and neighborhood SES

<sup>c</sup>P-values estimated from a logistic mixed model with a random intercept for census tract clustering using a two-sided hypothesis test.

<sup>d</sup>Compares non-Hispanic white mother versus otherwise

<sup>e</sup>Compares 5-year change in maternal age

<sup>f</sup>Compares 500-gram change in birthweight

<sup>g</sup>Compares 1-week change in gestational age

<sup>h</sup>Compares first live birth versus otherwise

Web Table 5. Associations Between Paternal Involvement and Combined Childhood Cancer Incidence; Registry-Based Case-Cohort Study, Minnesota Cancer Surveillance System Linked to Minnesota Birth Registry, 1989-2014 (Total Sample=14,854; Controls=11,907)

| Model           | Paternal Information Recorded on the Birth Record (Versus Missing) <sup>a</sup> |            |                |
|-----------------|---------------------------------------------------------------------------------|------------|----------------|
|                 | OR                                                                              | 95% CI     | P <sup>b</sup> |
| 1A <sup>c</sup> | 1.25                                                                            | 1.07, 1.47 | <0.01          |
| 2A <sup>d</sup> | 1.18                                                                            | 1.00, 1.38 | 0.05           |
| 3A <sup>e</sup> | 1.13                                                                            | 0.96, 1.33 | 0.15           |
| 4A <sup>f</sup> | 1.12                                                                            | 0.95, 1.32 | 0.19           |
| 5A <sup>g</sup> | 1.11                                                                            | 0.93, 1.31 | 0.21           |

Abbreviations: CI, confidence interval; OR, odds ratio

<sup>a</sup>Paternal involvement modeled as 0 if father's race, ethnicity, age, and education were all missing from the birth certificate (N=1,188; 198 cases; 990 controls); modeled as 1 if otherwise.

<sup>b</sup>P-values estimated from a logistic mixed model with a random intercept for census tract clustering using a two-sided hypothesis test.

<sup>c</sup>Model 1A bivariate

<sup>d</sup>Model 2A adjusted for maternal race/ethnicity

<sup>e</sup>Model 3A adjusted for maternal race/ethnicity, maternal age, birth order, birth year, and sex

<sup>f</sup>Model 4A adjusted for maternal race/ethnicity, maternal age, birth order, birth year, sex, birthweight, and gestational age

<sup>g</sup>Model 5A adjusted for maternal race/ethnicity, maternal age, birth order, birth year, sex, birthweight, gestational age, and neighborhood SES



Web Table 6. Associations Between SES and Combined Childhood Cancer Incidence Stratified by Rural/Urban Status; Registry-Based Case-Cohort Study, Minnesota Cancer Surveillance System Linked to Minnesota Birth Registry, 1989-2014 (Total Sample=14,854; Controls=11,907)

| Model                     | Urban <sup>a</sup><br>(n = 11,907) |            |                | Rural <sup>a</sup><br>(n = 2,947) |            |                |
|---------------------------|------------------------------------|------------|----------------|-----------------------------------|------------|----------------|
|                           | OR                                 | 95% CI     | P <sup>b</sup> | OR                                | 95% CI     | P <sup>b</sup> |
| <i>Maternal Education</i> |                                    |            |                |                                   |            |                |
| 1A <sup>c</sup>           | 1.09                               | 1.04, 1.14 | <0.001         | 1.08                              | 0.97, 1.20 | 0.18           |
| 2A <sup>d</sup>           | 1.05                               | 1.01, 1.11 | 0.03           | 1.08                              | 0.97, 1.21 | 0.18           |
| 3A <sup>e</sup>           | 1.03                               | 0.97, 1.08 | 0.33           | 1.09                              | 0.97, 1.23 | 0.16           |
| 4A <sup>f</sup>           | 1.02                               | 0.97, 1.08 | 0.43           | 1.09                              | 0.96, 1.23 | 0.18           |
| 5A <sup>g</sup>           | 1.02                               | 0.96, 1.07 | 0.57           | 1.09                              | 0.96, 1.23 | 0.19           |
| <i>Neighborhood SES</i>   |                                    |            |                |                                   |            |                |
| 1B <sup>c</sup>           | 1.10                               | 1.05, 1.15 | <0.001         | 1.04                              | 0.86, 1.25 | 0.69           |
| 2B <sup>d</sup>           | 1.06                               | 1.00, 1.11 | 0.03           | 1.04                              | 0.86, 1.26 | 0.71           |
| 3B <sup>e</sup>           | 1.04                               | 0.99, 1.10 | 0.12           | 1.06                              | 0.87, 1.30 | 0.55           |
| 4B <sup>f</sup>           | 1.04                               | 0.99, 1.09 | 0.16           | 1.07                              | 0.87, 1.30 | 0.52           |
| 5B <sup>g</sup>           | 1.02                               | 0.96, 1.07 | 0.57           | 1.09                              | 0.96, 1.23 | 0.19           |

Abbreviations: CI, confidence interval; OR, odds ratio; SES, socioeconomic status

<sup>a</sup>Rural Urban Commuting Area (RUCA) codes used to categorize census tracts as urban (RUCA < 7) or rural (RUCA ≥ 7). Urban: cases = 1,976; controls = 9,931. Rural: cases = 516; controls = 2,431.

<sup>b</sup>P-values estimated from a logistic mixed model with a random intercept for census tract clustering using a two-sided hypothesis test.

<sup>c</sup>Model 1A/B bivariate

<sup>d</sup>Model 2A/B adjusted for maternal race/ethnicity

<sup>e</sup>Model 3A/B adjusted for maternal race/ethnicity, maternal age, birth order, birth year, and sex

<sup>f</sup>Model 4A/B adjusted for maternal race/ethnicity, maternal age, birth order, birth year, sex, birthweight, and gestational age

<sup>g</sup>Model 5A/B adjusted for maternal race/ethnicity, maternal age, birth order, birth year, sex, birthweight, gestational age, and neighborhood SES/maternal education

Web Table 7. Correlation Matrix of the Five Census Tract Measures Included in the Neighborhood SES Composite Index; Registry-Based Case-Cohort Study, Minnesota Cancer Surveillance System Linked to Minnesota Birth Registry, 1989-2014 (N=14,854)

| SES Measure                       | Pearson Correlation |      |      |      |   |
|-----------------------------------|---------------------|------|------|------|---|
|                                   | 1                   | 2    | 3    | 4    | 5 |
| 1. % below poverty line           | 1                   |      |      |      |   |
| 2. % aged 16+ unemployed          | 0.69                | 1    |      |      |   |
| 3. % age 25+ < HS education       | 0.68                | 0.60 | 1    |      |   |
| 4. % welfare or public assistance | 0.83                | 0.67 | 0.71 | 1    |   |
| 5. % female headed household      | 0.74                | 0.52 | 0.44 | 0.70 | 1 |

Abbreviations: HS, high school; SES, socioeconomic status

Web Table 8. Associations Between Dimensions of Neighborhood SES and Combined Childhood Cancer Incidence; Registry-Based Case-Cohort Study, Minnesota Cancer Surveillance System Linked to Minnesota Birth Registry, 1989-2014 (Total Sample=14,854; Controls=11,907)

| Model           | Poverty <sup>a</sup><br>(SD = 0.09) |            |                | <HS Education <sup>a</sup><br>(SD = 0.09) |            |                | Unemployed <sup>a</sup><br>(SD = 0.03) |            |                | Welfare <sup>a</sup><br>(SD = 0.06) |            |                | Female HH <sup>a</sup><br>(SD = 0.13) |            |                |
|-----------------|-------------------------------------|------------|----------------|-------------------------------------------|------------|----------------|----------------------------------------|------------|----------------|-------------------------------------|------------|----------------|---------------------------------------|------------|----------------|
|                 | OR                                  | 95% CI     | P <sup>b</sup> | OR                                        | 95% CI     | P <sup>b</sup> | OR                                     | 95% CI     | P <sup>b</sup> | OR                                  | 95% CI     | P <sup>b</sup> | OR                                    | 95% CI     | P <sup>b</sup> |
| 1B <sup>c</sup> | 1.10                                | 1.04, 1.15 | <0.001         | 1.04                                      | 0.99, 1.09 | 0.09           | 1.07                                   | 1.02, 1.11 | 0.01           | 1.10                                | 1.04, 1.15 | <0.01          | 1.10                                  | 1.05, 1.15 | <0.001         |
| 2B <sup>d</sup> | 1.06                                | 1.00, 1.12 | 0.04           | 1.02                                      | 0.97, 1.07 | 0.48           | 1.04                                   | 0.99, 1.09 | 0.11           | 1.06                                | 1.00, 1.12 | 0.05           | 1.06                                  | 1.00, 1.11 | 0.03           |
| 3B <sup>e</sup> | 1.04                                | 0.99, 1.10 | 0.11           | 1.00                                      | 0.95, 1.05 | 0.95           | 1.03                                   | 0.98, 1.08 | 0.23           | 1.04                                | 0.98, 1.10 | 0.15           | 1.05                                  | 1.00, 1.11 | 0.06           |
| 4B <sup>f</sup> | 1.04                                | 0.99, 1.10 | 0.15           | 1.00                                      | 0.95, 1.05 | 0.87           | 1.03                                   | 0.98, 1.08 | 0.26           | 1.04                                | 0.98, 1.10 | 0.18           | 1.05                                  | 0.99, 1.10 | 0.08           |
| 5B <sup>g</sup> | 1.04                                | 0.98, 1.09 | 0.19           | 0.99                                      | 0.94, 1.04 | 0.69           | 1.02                                   | 0.98, 1.08 | 0.32           | 1.04                                | 0.98, 1.10 | 0.23           | 1.05                                  | 0.99, 1.10 | 0.10           |

Abbreviations: CI, confidence interval; Female HH, % female headed households within census tract; HS Education, % aged 25+ with less than a high school education within census tract; OR, odds ratio; Poverty, % below poverty line within census tract; SD, standard deviation; Unemployed, % aged 16+ in the workforce unemployed within census tract; Welfare, % on welfare or public assistance within census tract

<sup>a</sup>Neighborhood SES variables reverse coded and standardized so that a 1-unit change reflects a 1-standard deviation decrease (e.g. Model 1B indicates that a 1-SD (9%) decrease in census tract % poverty is associated with a 10% increased odds of combined childhood cancer incidence.

<sup>b</sup>P-values estimated from a logistic mixed model with a random intercept for census tract clustering using a two-sided hypothesis test.

<sup>c</sup>Model 1B bivariate

<sup>d</sup>Model 2B adjusted for maternal race/ethnicity

<sup>e</sup>Model 3B adjusted for maternal race/ethnicity, maternal age, birth order, birth year, and sex

<sup>f</sup>Model 4B adjusted for maternal race/ethnicity, maternal age, birth order, birth year, sex, birthweight, and gestational age

<sup>g</sup>Model 5B adjusted for maternal race/ethnicity, maternal age, birth order, birth year, sex, birthweight, gestational age, and maternal education

Web Table 9. Testing Validity of Linearly Interpolated Census Tract SES Composite Index: Associations Between Neighborhood SES and Combined Childhood Cancer Incidence; Registry-Based Case-Cohort Study, Minnesota Cancer Surveillance System Linked to Minnesota Birth Registry, 1989-2014 (Total Sample=14,854; Controls=11,907)

| Model           | All Participants<br>(n = 14,854)          |            |                |                                                   |            |                |      | Participants Born Within 2 Years of US Census<br>(n = 10,762) <sup>a</sup> |                |      |                                                   |                |  |
|-----------------|-------------------------------------------|------------|----------------|---------------------------------------------------|------------|----------------|------|----------------------------------------------------------------------------|----------------|------|---------------------------------------------------|----------------|--|
|                 | Linearly Interpolated<br>Neighborhood SES |            |                | Non-Interpolated<br>Neighborhood SES <sup>b</sup> |            |                |      | Linearly Interpolated<br>Neighborhood SES                                  |                |      | Non-Interpolated<br>Neighborhood SES <sup>b</sup> |                |  |
|                 | OR                                        | 95% CI     | P <sup>c</sup> | OR                                                | 95% CI     | P <sup>c</sup> | OR   | 95% CI                                                                     | P <sup>c</sup> | OR   | 95% CI                                            | P <sup>c</sup> |  |
| 1B <sup>d</sup> | 1.09                                      | 1.04, 1.14 | <0.001         | 1.09                                              | 1.04, 1.14 | <0.001         | 1.10 | 1.04, 1.15                                                                 | <0.001         | 1.09 | 1.04, 1.15                                        | <0.01          |  |
| 2B <sup>e</sup> | 1.05                                      | 1.00, 1.11 | 0.04           | 1.05                                              | 1.00, 1.10 | 0.04           | 1.07 | 1.01, 1.13                                                                 | 0.02           | 1.07 | 1.01, 1.13                                        | 0.02           |  |
| 3B <sup>f</sup> | 1.04                                      | 0.99, 1.09 | 0.12           | 1.04                                              | 0.99, 1.09 | 0.12           | 1.06 | 1.00, 1.12                                                                 | 0.05           | 1.05 | 1.00, 1.11                                        | 0.07           |  |
| 4B <sup>g</sup> | 1.04                                      | 0.99, 1.09 | 0.16           | 1.04                                              | 0.99, 1.09 | 0.15           | 1.05 | 1.00, 1.12                                                                 | 0.07           | 1.05 | 0.99, 1.11                                        | 0.08           |  |
| 5B <sup>h</sup> | 1.03                                      | 0.98, 1.09 | 0.21           | 1.03                                              | 0.98, 1.09 | 0.20           | 1.05 | 0.99, 1.11                                                                 | 0.08           | 1.05 | 0.99, 1.11                                        | 0.10           |  |

Abbreviations: CI, confidence interval; OR, odds ratio; SES, socioeconomic status

<sup>a</sup>Includes children born between 1989-1992 (2-year window around 1990 census); 1998-2002 (2-year window around 2000 census); and 2003-2011 (2-year window around 2005-2009 ACS 5-year estimates). Cases = 2,134; controls = 8,628.

<sup>b</sup>Non-interpolated SES values assigned based on US Census (1990, 2000, or 2005-2009 ACS) occurring closest to the given birth year. Therefore, births between 1989 and 1995 were assigned 1990 census values; births 1996-2002 were assigned 2000 census values; and births 2003-2014 were assigned 2005-2009 ACS 5-year estimates.

<sup>c</sup>P-values estimated from a logistic mixed model with a random intercept for census tract clustering using a two-sided hypothesis test.

<sup>d</sup>Model 1B bivariate

<sup>e</sup>Model 2B adjusted for maternal race/ethnicity

<sup>f</sup>Model 3B adjusted for maternal race/ethnicity, maternal age, birth order, birth year, and sex

<sup>g</sup>Model 4B adjusted for maternal race/ethnicity, maternal age, birth order, birth year, sex, birthweight, and gestational age

<sup>h</sup>Model 5B adjusted for maternal race/ethnicity, maternal age, birth order, birth year, sex, birthweight, gestational age, and maternal education

Web Table 10. Associations Between SES and Incidence of Childhood Lymphomas Stratified by Cancer Subtype; Registry-Based Case-Cohort Study, Minnesota Cancer Surveillance System Linked to Minnesota Birth Registry, 1989-2014 (Total Sample=14,854; Controls=11,907)

| Model                     | Hodgkin Lymphoma<br>(n = 67) |            |                | Non-Hodgkin Lymphoma<br>Excluding Burkitt<br>(n = 97) |            |                | Burkitt Lymphoma<br>(n = 47) |            |                | Other and Unspecified Lymphoma<br>(n = 100) |            |                |
|---------------------------|------------------------------|------------|----------------|-------------------------------------------------------|------------|----------------|------------------------------|------------|----------------|---------------------------------------------|------------|----------------|
|                           | OR                           | 95% CI     | P <sup>a</sup> | OR                                                    | 95% CI     | P <sup>a</sup> | OR                           | 95% CI     | P <sup>a</sup> | OR                                          | 95% CI     | P <sup>a</sup> |
| <i>Maternal Education</i> |                              |            |                |                                                       |            |                |                              |            |                |                                             |            |                |
| 1A <sup>b</sup>           | 0.98                         | 0.77, 1.25 | 0.89           | 0.97                                                  | 0.79, 1.78 | 0.74           | 1.25                         | 0.92, 1.68 | 0.15           | 1.33                                        | 1.08, 1.64 | <0.01          |
| 2A <sup>c</sup>           | 0.97                         | 0.76, 1.25 | 0.84           | 0.99                                                  | 0.80, 1.22 | 0.91           | 1.12                         | 0.82, 1.53 | 0.46           | 1.35                                        | 1.09, 1.67 | <0.01          |
| 3A <sup>d</sup>           | 1.02                         | 0.76, 1.35 | 0.92           | 1.05                                                  | 0.83, 1.33 | 0.67           | 1.22                         | 0.86, 1.75 | 0.27           | 1.23                                        | 0.97, 1.56 | 0.09           |
| 4A <sup>e</sup>           | 1.01                         | 0.76, 1.34 | 0.95           | 1.07                                                  | 0.84, 1.35 | 0.59           | 1.21                         | 0.85, 1.73 | 0.29           | 1.23                                        | 0.97, 1.57 | 0.09           |
| 5A <sup>f</sup>           | 1.01                         | 0.76, 1.35 | 0.94           | 1.05                                                  | 0.83, 1.34 | 0.67           | 1.19                         | 0.83, 1.71 | 0.34           | 1.17                                        | 0.92, 1.49 | 0.21           |
| <i>Neighborhood SES</i>   |                              |            |                |                                                       |            |                |                              |            |                |                                             |            |                |
| 1B <sup>b</sup>           | 0.99                         | 0.79, 1.25 | 0.95           | 1.00                                                  | 0.82, 1.21 | 0.98           | 1.33                         | 0.92, 1.93 | 0.13           | 1.48                                        | 1.12, 1.95 | <0.01          |
| 2B <sup>c</sup>           | 0.98                         | 0.76, 1.27 | 0.88           | 1.04                                                  | 0.83, 1.28 | 0.75           | 1.13                         | 0.75, 1.69 | 0.56           | 1.53                                        | 1.15, 2.05 | <0.01          |
| 3B <sup>d</sup>           | 1.00                         | 0.76, 1.31 | 0.99           | 1.07                                                  | 0.85, 1.34 | 0.55           | 1.16                         | 0.76, 1.77 | 0.51           | 1.43                                        | 1.08, 1.91 | 0.01           |
| 4B <sup>e</sup>           | 1.00                         | 0.76, 1.31 | 0.98           | 1.08                                                  | 0.86, 1.36 | 0.48           | 1.16                         | 0.76, 1.78 | 0.50           | 1.43                                        | 1.07, 1.91 | 0.01           |
| 5B <sup>f</sup>           | 1.01                         | 0.76, 1.35 | 0.96           | 1.05                                                  | 0.83, 1.33 | 0.67           | 1.19                         | 0.83, 1.71 | 0.34           | 1.39                                        | 1.04, 1.85 | 0.03           |

Abbreviations: CI, confidence interval; OR, odds ratio; SES, socioeconomic status

<sup>a</sup>P-values estimated from a logistic mixed model with a random intercept for census tract clustering using a two-sided hypothesis test.

<sup>b</sup>Model 1A/B bivariate

<sup>c</sup>Model 2A/B adjusted for maternal race/ethnicity

<sup>d</sup>Model 3A/B adjusted for maternal race/ethnicity, maternal age, birth order, birth year, and sex

<sup>e</sup>Model 4A/B adjusted for maternal race/ethnicity, maternal age, birth order, birth year, sex, birthweight, and gestational age

<sup>f</sup>Model 5A/B adjusted for maternal race/ethnicity, maternal age, birth order, birth year, sex, birthweight, gestational age, and neighborhood SES/maternal education

Web Table 11. Associations Between Maternal Education and Incidence of Childhood Central Nervous System Tumors Stratified by Cancer Subtype; Registry-Based Case-Cohort Study, Minnesota Cancer Surveillance System Linked to Minnesota Birth Registry, 1989-2014 (Total Sample=14,854; Controls=11,907)

| Model                     | Ependyomas and Choroid Plexus Tumors (n = 87) |            |                | Astrocytomas (n = 305) |            |                | Intracranial and Intraspinal Tumors (n = 119) |            |                | Other Specified and Unspecified CNS Tumors (n = 151) |            |                |
|---------------------------|-----------------------------------------------|------------|----------------|------------------------|------------|----------------|-----------------------------------------------|------------|----------------|------------------------------------------------------|------------|----------------|
|                           | OR                                            | 95% CI     | P <sup>a</sup> | OR                     | 95% CI     | P <sup>a</sup> | OR                                            | 95% CI     | P <sup>a</sup> | OR                                                   | 95% CI     | P <sup>a</sup> |
| <i>Maternal Education</i> |                                               |            |                |                        |            |                |                                               |            |                |                                                      |            |                |
| 1A <sup>b</sup>           | 1.21                                          | 0.97, 1.51 | 0.08           | 1.07                   | 0.96, 1.20 | 0.24           | 0.96                                          | 0.80, 1.15 | 0.64           | 1.12                                                 | 1.04, 1.21 | <0.01          |
| 2A <sup>c</sup>           | 1.15                                          | 0.92, 1.45 | 0.22           | 1.01                   | 0.89, 1.14 | 0.89           | 0.90                                          | 0.75, 1.09 | 0.27           | 1.06                                                 | 0.97, 1.15 | 0.18           |
| 3A <sup>d</sup>           | 1.13                                          | 0.88, 1.47 | 0.34           | 1.02                   | 0.89, 1.16 | 0.82           | 0.95                                          | 0.76, 1.18 | 0.63           | 1.06                                                 | 0.96, 1.16 | 0.24           |
| 4A <sup>e</sup>           | 1.13                                          | 0.87, 1.46 | 0.35           | 1.01                   | 0.88, 1.16 | 0.89           | 0.94                                          | 0.76, 1.17 | 0.60           | 1.05                                                 | 0.96, 1.16 | 0.29           |
| 5A <sup>f</sup>           | 1.16                                          | 0.89, 1.51 | 0.27           | 0.99                   | 0.87, 1.14 | 0.93           | 0.93                                          | 0.75, 1.16 | 0.54           | 1.04                                                 | 0.95, 1.15 | 0.42           |
| <i>Neighborhood SES</i>   |                                               |            |                |                        |            |                |                                               |            |                |                                                      |            |                |
| 1B <sup>b</sup>           | 1.00                                          | 0.82, 1.24 | 0.97           | 1.20                   | 1.05, 1.37 | <0.01          | 1.10                                          | 0.91, 1.34 | 0.33           | 1.18                                                 | 1.08, 1.29 | <0.001         |
| 2B <sup>c</sup>           | 0.89                                          | 0.71, 1.13 | 0.33           | 1.11                   | 0.96, 1.28 | 0.17           | 1.02                                          | 0.82, 1.27 | 0.85           | 1.09                                                 | 0.99, 1.20 | 0.09           |
| 3B <sup>d</sup>           | 0.87                                          | 0.69, 1.10 | 0.25           | 1.12                   | 0.96, 1.30 | 0.14           | 1.06                                          | 0.85, 1.33 | 0.60           | 1.09                                                 | 0.98, 1.20 | 0.10           |
| 4B <sup>e</sup>           | 0.87                                          | 0.69, 1.10 | 0.25           | 1.12                   | 0.96, 1.30 | 0.15           | 1.06                                          | 0.85, 1.33 | 0.60           | 1.09                                                 | 0.98, 1.20 | 0.11           |
| 5B <sup>f</sup>           | 0.82                                          | 0.67, 1.08 | 0.18           | 1.12                   | 0.96, 1.30 | 0.15           | 0.93                                          | 0.75, 1.16 | 0.54           | 1.04                                                 | 0.95, 1.15 | 0.42           |

Abbreviations: CI, confidence interval; OR, odds ratio; SES, socioeconomic status

<sup>a</sup>P-values estimated from a logistic mixed model with a random intercept for census tract clustering using a two-sided hypothesis test.

<sup>b</sup>Model 1A/B bivariate

<sup>c</sup>Model 2A/B adjusted for maternal race/ethnicity

<sup>d</sup>Model 3A/B adjusted for maternal race/ethnicity, maternal age, birth order, birth year, and sex

<sup>e</sup>Model 4A/B adjusted for maternal race/ethnicity, maternal age, birth order, birth year, sex, birthweight, and gestational age

<sup>f</sup>Model 5A/B adjusted for maternal race/ethnicity, maternal age, birth order, birth year, sex, birthweight, gestational age, and neighborhood SES/maternal education

Web Table 12. Associations Between SES and Combined Childhood Cancer Incidence Stratified by Age Group at Diagnosis; Registry-Based Case-Cohort Study, Minnesota Cancer Surveillance System Linked to Minnesota Birth Registry, 1989-2014 (Total Sample=14,854; Controls=11,907)

| Model                     | 0-4 Years<br>(n = 1,702) |            |                | 5-9 Years<br>(n = 690) |            |                | 10-14 Years<br>(n = 555) |            |                |
|---------------------------|--------------------------|------------|----------------|------------------------|------------|----------------|--------------------------|------------|----------------|
|                           | OR                       | 95% CI     | P <sup>a</sup> | OR                     | 95% CI     | P <sup>a</sup> | OR                       | 95% CI     | P <sup>a</sup> |
| <i>Maternal Education</i> |                          |            |                |                        |            |                |                          |            |                |
| 1A <sup>b</sup>           | 1.11                     | 1.05, 1.17 | <0.001         | 1.08                   | 1.00, 1.16 | 0.07           | 1.00                     | 0.92, 1.09 | 0.96           |
| 2A <sup>c</sup>           | 1.10                     | 1.04, 1.16 | <0.01          | 1.04                   | 0.96, 1.13 | 0.29           | 0.94                     | 0.86, 1.03 | 0.21           |
| 3A <sup>d</sup>           | 1.03                     | 0.97, 1.10 | 0.31           | 1.06                   | 0.97, 1.17 | 0.2            | 1.01                     | 0.91, 1.12 | 0.81           |
| 4A <sup>e</sup>           | 1.03                     | 0.97, 1.09 | 0.41           | 1.06                   | 0.96, 1.16 | 0.26           | 1.01                     | 0.91, 1.12 | 0.85           |
| 5A <sup>f</sup>           | 1.02                     | 0.96, 1.09 | 0.53           | 1.05                   | 0.96, 1.15 | 0.31           | 1.01                     | 0.91, 1.12 | 0.92           |
| <i>Neighborhood SES</i>   |                          |            |                |                        |            |                |                          |            |                |
| 1B <sup>b</sup>           | 1.09                     | 1.03, 1.15 | <0.01          | 1.09                   | 1.00, 1.18 | 0.05           | 1.08                     | 0.99, 1.18 | 0.10           |
| 2B <sup>c</sup>           | 1.08                     | 1.01, 1.15 | 0.02           | 1.04                   | 0.95, 1.14 | 0.38           | 0.99                     | 0.90, 1.10 | 0.88           |
| 3B <sup>d</sup>           | 1.05                     | 0.98, 1.11 | 0.14           | 1.04                   | 0.95, 1.15 | 0.35           | 1.03                     | 0.93, 1.15 | 0.53           |
| 4B <sup>e</sup>           | 1.04                     | 0.98, 1.11 | 0.18           | 1.04                   | 0.95, 1.14 | 0.39           | 1.03                     | 0.93, 1.15 | 0.56           |
| 5B <sup>f</sup>           | 1.02                     | 0.96, 1.09 | 0.53           | 1.03                   | 0.94, 1.14 | 0.50           | 1.03                     | 0.93, 1.15 | 0.57           |

Abbreviations: CI, confidence interval; OR, odds ratio; SES, socioeconomic status

<sup>a</sup>P-values estimated from a logistic mixed model with a random intercept for census tract clustering using a two-sided hypothesis test.

<sup>b</sup>Model 1A/B bivariate

<sup>c</sup>Model 2A/B adjusted for maternal race/ethnicity

<sup>d</sup>Model 3A/B adjusted for maternal race/ethnicity, maternal age, birth order, birth year, and sex

<sup>e</sup>Model 4A/B adjusted for maternal race/ethnicity, maternal age, birth order, birth year, sex, birthweight, and gestational age

<sup>f</sup>Model 5A/B adjusted for maternal race/ethnicity, maternal age, birth order, birth year, sex, birthweight, gestational age, and neighborhood SES/maternal education

Web Table 13. Associations Between SES and Combined Childhood Cancer Incidence Stratified by Race and Ethnicity; Registry-Based Case-Cohort Study, Minnesota Cancer Surveillance System Linked to Minnesota Birth Registry, 1989-2014 (Total Sample=14,854; Controls=11,907)

|                           | Non-Hispanic White <sup>a</sup> |            |                | Non-Hispanic Black <sup>b</sup> |            |                | Hispanic <sup>c</sup> |            |                | Other <sup>d</sup> |            |                |
|---------------------------|---------------------------------|------------|----------------|---------------------------------|------------|----------------|-----------------------|------------|----------------|--------------------|------------|----------------|
|                           | OR                              | 95% CI     | P <sup>e</sup> | OR                              | 95% CI     | P <sup>e</sup> | OR                    | 95% CI     | P <sup>e</sup> | OR                 | 95% CI     | P <sup>e</sup> |
| <i>Maternal Education</i> |                                 |            |                |                                 |            |                |                       |            |                |                    |            |                |
| 1A <sup>f</sup>           | 1.08                            | 1.03, 1.13 | <0.01          | 0.96                            | 0.78, 1.20 | 0.74           | 0.98                  | 0.82, 1.17 | 0.84           | 0.94               | 0.81, 1.10 | 0.46           |
| 3A <sup>g</sup>           | 1.06                            | 1.01, 1.12 | 0.02           | 0.91                            | 0.72, 1.16 | 0.45           | 0.96                  | 0.80, 1.17 | 0.70           | 0.89               | 0.75, 1.07 | 0.22           |
| 4A <sup>h</sup>           | 1.06                            | 1.00, 1.12 | 0.04           | 0.90                            | 0.71, 1.15 | 0.41           | 0.96                  | 0.79, 1.17 | 0.68           | 0.90               | 0.75, 1.08 | 0.27           |
| 5A <sup>i</sup>           | 1.05                            | 1.00, 1.11 | 0.07           | 0.92                            | 0.72, 1.17 | 0.50           | 0.96                  | 0.79, 1.17 | 0.71           | 0.89               | 0.74, 1.08 | 0.24           |
| <i>Neighborhood SES</i>   |                                 |            |                |                                 |            |                |                       |            |                |                    |            |                |
| 1B <sup>f</sup>           | 1.08                            | 1.02, 1.16 | 0.01           | 0.97                            | 0.86, 1.10 | 0.65           | 0.98                  | 0.85, 1.15 | 0.84           | 1.02               | 0.92, 1.13 | 0.69           |
| 3B <sup>g</sup>           | 1.07                            | 1.00, 1.14 | 0.05           | 0.95                            | 0.84, 1.08 | 0.43           | 0.98                  | 0.84, 1.15 | 0.82           | 1.01               | 0.90, 1.13 | 0.88           |
| 4B <sup>h</sup>           | 1.06                            | 1.00, 1.14 | 0.07           | 0.95                            | 0.83, 1.07 | 0.39           | 0.98                  | 0.84, 1.14 | 0.80           | 1.01               | 0.90, 1.13 | 0.87           |
| 5B <sup>i</sup>           | 1.05                            | 0.99, 1.13 | 0.12           | 0.95                            | 0.84, 1.09 | 0.49           | 0.99                  | 0.84, 1.15 | 0.85           | 1.03               | 0.92, 1.15 | 0.64           |

Abbreviations: CI, confidence interval; OR, odds ratio; SES, socioeconomic status

<sup>a</sup>Cases = 2,496; controls = 9,631

<sup>b</sup>Cases = 113; controls = 770

<sup>c</sup>Cases = 147; controls = 602

<sup>d</sup>Cases = 179; controls = 834

<sup>e</sup>P-values estimated from a logistic mixed model with a random intercept for census tract clustering using a two-sided hypothesis test.

<sup>f</sup>Model 1A/B bivariate

<sup>g</sup>Model 3A/B adjusted for maternal age, birth order, birth year, and sex

<sup>h</sup>Model 4A/B adjusted for maternal age, birth order, birth year, sex, birthweight, and gestational age

<sup>i</sup>Model 5A/B adjusted for maternal age, birth order, birth year, sex, birthweight, gestational age, and neighborhood SES/maternal education
